# Supplementary material for: Microbial predators form a new supergroup of eukaryotes
Source: Springer Nature journal article supplement (doi:10.1038/s41586-022-05511-5), 2022-12-07
Supplement: 41586_2022_5511_MOESM5_ESM.pdf [file 41586_2022_5511_MOESM5_ESM.pdf]

|                               | Size<br>(bp) | % G+C | Intergenic:<br>avg, max | % coding | Conserved<br>proteins | uORFs | tRNAs | Introns | Conformation |
|-------------------------------|--------------|-------|-------------------------|----------|-----------------------|-------|-------|---------|--------------|
| <i>A. twista</i> <sup>a</sup> | 52,735       | 35    | 111, 629                | 82       | 47                    | 9     | 24    | 0       | Circular     |
| <i>N. marisrubri</i>          | 69,586       | 28.5  | 48, 232                 | 91       | 45                    | 3     | 24    | 0       | Circular     |
| <i>U. fretuma</i>             | 68,533       | 27.5  | 321, 1741               | 62       | 51                    | 1     | 24    | 0       | Circular     |
| <i>N. kosolapovi</i>          | >88,532      | 24.6  | 198, 735                | 82       | 51                    | ≥8    | ≥23   | ≥19     | Undetermined |
| <i>N. quarantinus</i>         | 76,129       | 24.7  | 199, 1009               | 76       | 51                    | 11*   | 23    | 7       | Circular     |
| <i>N. curacuas</i>            | 65,762       | 25.3  | 136, 476                | 83       | 51                    | 4     | 23    | 9       | Circular     |

<sup>a</sup> Previously published *Ancoracysta twista* mitochondrial genome (NC\_036491).
